# Supplementary material
Source: publisher site journal article supplement (https://arthropod-systematics.arphahub.com/article/64252/download/suppl/310/)
Supplement: Supplementary file 1

## Sheet: Sheet1
Specimen	Rickettsia	Wolbachia			Rickettsia detected in Liophloeus			Wolbachia detected in the Liophloeus.
001 L.tessulatus Bosnia and Herzegovina: Dinaric Alps	+	not tested			- detected			-(ftsz): ftsz not detected
002 L.(L.) lentus Bosnia and Herzegovina: Dinaric Alps	not tested	not tested			+ not detected			ftsZ: ftsZ detected
003 L. (L.) pupillatus Bosnia and Herzegovina: Dinaric Alps	-	not tested			sequence: sequence obtained			ftsZ: ftsZ sequence obtained
004 L. (L.) pupillatus Bosnia and Herzegovina: Dinaric Alps	-	-(ftsZ)						-(wsp): wsp not detected
005 L.(L.) lentus Bosnia and Herzegovina: Dinaric Alps	-	-(ftsZ)						wsp: wsp detected
006 L.(L.) lentus Bosnia and Herzegovina: Dinaric Alps	-	not tested						wsp: wsp sequence obtained
009 L.(L.) lentus Serbia: Golija	+	not tested
011 L.(L.) lentus Poland: Tatry Zachodnie	-	-(ftsZ)
014 Liophloeodes Hungary: Bukk	-	-(ftsZ)
015 Liophloeodes Hungary: Matra	sequence	not tested
016 L. (L.) gibbus Hungary: Zempleni	sequence	not tested
024 L. (L.) lentus Hungary: Börzsöny	+	not tested
025 L. (L.) lentus Hungary: Börzsöny	sequence	not tested
026 L. (L.) lentus Hungary: Börzsöny	sequence	not tested
028 L. (L.) lentus Hungary: Mecsek	+	not tested
029 L. (L.) lentus Hungary: Mecsek	+	not tested
030 L. (L.) gibbus Hungary: Bukk	sequence	not tested
032 L. (L.) lentus Slovakia: Nizke Tatry	sequence	not tested
033 L. (L.) lentus Poland: Pogórze Wielickie	sequence	not tested
034 L. (L.) gibbus Romania: Muntii Vladeasa (Apuseni)	sequence	not tested
036 L. (L.) gibbus Romania: Muntii Vladeasa (Apuseni)	sequence	not tested
037 L. (L.) gibbus Romania: Muntii Vladeasa (Apuseni)	sequence	-(ftsZ)
039 L.(L.) liptoviensis Romania: Transylvanian Plateau	sequence	-(ftsZ)
040 L.(L.) liptoviensis Romania: Transylvanian Plateau	sequence	not tested
042 L. (L.) gibbus Romania: Muntii Vladeasa (Apuseni)	-	-(ftsZ)
044 L.(L.) liptoviensis Romania: Transylvanian Plateau	-	not tested
045 L.(L.) liptoviensis Romania: Transylvanian Plateau	sequence	not tested
054 L. (L.) lentus Poland: Gorce	-	not tested
055 L. (L.) lentus Poland: Gorce	+	not tested
060 L. (L.) lentus Poland: Gorce	+	-(ftsZ)
063 L. (L.) gibbus Poland: Pieniny	not tested	ftsZ
072 L. (L.) gibbus Poland: Beskid Niski	+	not tested
075 L. (L.) gibbus Poland: Beskid Niski	sequence	not tested
076 L. (L.) gibbus Poland: Beskid Niski	sequence	not tested
079 L. (L.) gibbus Poland: Beskid Niski	not tested	-(ftsZ)
107 L. tessulatus Poland:Beskid Zywiecki	wsp	wsp
109 L. (L.) lentus Austria: Steirisch-niederösterreichische Kalkalpen	-	-(wsp)
134 L. (L.) lentus Poland: Gorce	not tested	ftsZ
137 L. (L.) gibbus Poland: Silesian Upland	sequence	-(wsp)
139 L.tessulatus Poland: Beskid Niski	not tested	wsp
142 L.tessulatus Slovenia: Labotniške Alpe	-	-(wsp)
151 L. (L.) lentus Slovakia: Veľká Fatra	-	-(wsp)
168 L.(L.) liptoviensis Slovenia: Karavanke	+	-(wsp)
201 L.(L.) liptoviensis Poland: Góry Sanocko-Turczańskie	sequence	wsp
210 L. (L.) gibbus Poland: Bieszczady	+	-(wsp)
211 L.(L.) liptoviensis Poland: Bieszczady	sequence	wsp
213 L.(L.) liptoviensis Poland: Bieszczady	-	wsp
214 L.(L.) liptoviensis Poland: Bieszczady	+	wsp
233 L. (L.)gibbus Poland: Gorce	+	wsp
242 L. (L.) lentus Serbia: Fruška gora	+	-(wsp)
246 L. (L.) lentus Serbia: Vlasina	-	wsp
248 L. (L.) lentus Serbia: Stari Vlah	+	wsp
250 L. (L.) lentus Bulgaria: Witosza	+	wsp
267 L.(L.) liptoviensis Romania: Transylvanian Plateau	+	-(wsp
269 L.(L.) liptoviensis Romania: Munții Rodnei/	sequence	-(wsp)
274 L. (L.) pupillatus Romania: Munții Bucegi	sequence	-(wsp)
301 L. (L.) lentus Slovakia: Belianske Tatry	+	-(wsp)
305 L. (L.) lentus Austria: Steirisch-niederösterreichische Kalkalpen	+	-(wsp)
308 L. (L.) lentus Austria: Gesäuse	+	-(wsp)
338 L.(L.) liptoviensis Slovakia: Muranska Planina	+	-(wsp)
348 L.(L.) liptoviensis Ukraine: Gorgany	-	-(wsp)
394 Liophloeodes Poland: Beskid Niski	not tested	ftsZ
395 Liophloeodes Poland: Beskid Wyspowy	not tested	ftsZ
396 L.tessulatus Poland: Beskid Niski	not tested	ftsZ
397 L. (L.) gibbus Poland: Pieniny	not tested	wsp
398 Liophloeodes Poland: Pieniny	not tested	wsp
399 L. tessulatus Poland: Gorce	not tested	wsp
400 L. (L.) lentus Slovakia: Nizke Tatry	not tested	wsp
474L. (L.) liptoviensis Hungary: Bukk	sequence	not tested
505 L. (L.) liptoviensis Hungary: Aggteleki-karszt	sequence	not tested
506 L. (L.) liptoviensis Romania:Muntii Gutai	sequence	not tested
509 L. (L.) liptoviensis Romania:Muntii Rodnei	sequence	not tested
525 L. (L.) herbstii Ukraine: Jaremcze	sequence	not tested
531 L. (L.) gibbus Ukraine: Woroniaki	sequence	not tested
536 L. (L.) herbstii Ukraine: Gorgany	sequence	not tested
573 L. tessulatus Poland: Polish Jurrasuc Highland	sequence	not tested
601 Liophloeodes Poland: Beskid Żywiecki	not tested	ftsZ
602 L. tessulatus Poland: Beskid Żywiecki	not tested	ftsZ
603 Liophloeodes Poland: Beskid Żywiecki	not tested	ftsZ
